# Supplementary material
Source: bioRxiv or medRxiv preprint supplement (https://www.biorxiv.org/highwire/filestream/76931/field_highwire_adjunct_files/1/250845-2.pdf)
Supplement: Supplementary file [file 250845-2.pdf]

**Table S1. Absolute killing levels in the ancestral wildtype and evolved populations.**

|                          | Pre-evolution (ancestral WT) <sup>a</sup> |                                                      | Post-evolution (evolved populations) <sup>b</sup> |                       |                       |                         |
|--------------------------|-------------------------------------------|------------------------------------------------------|---------------------------------------------------|-----------------------|-----------------------|-------------------------|
|                          |                                           |                                                      | no host, structured                               | no host, unstructured | with host, structured | with host, unstructured |
| <b>Killing on plates</b> | 83.9 %                                    | <b>Killing in evolved environment<sup>c</sup></b>    | 81.3 %                                            | 43.2 %                | 76.4 %                | 52.9 %                  |
| <b>Killing in liquid</b> | 76.2 %                                    | <b>Killing in reciprocal environment<sup>d</sup></b> | 87.4 %                                            | 40.5%                 | 85.5 %                | 49.3 %                  |

<sup>a</sup> averaged over 3-6 replicates depending on the killing assay (see methods for details)

<sup>b</sup> averaged over 8 replicate populations per treatment and 3-6 replicates per population (see methods for details)

<sup>c</sup> populations evolved on plates tested on plates, populations evolved in liquid tested in liquid; data shown in Fig. 1B relative to WT

<sup>d</sup> populations evolved on plates tested in liquid, populations evolved in liquid tested on plates; data shown in Fig. 1C relative to WT
